# Supplementary figures and images for: RNA-mediated non-mendelian inheritance of an epigenetic change in the mouse
Source: Springer Nature journal article supplement (doi:10.1038/nature04674), 2006-05-01

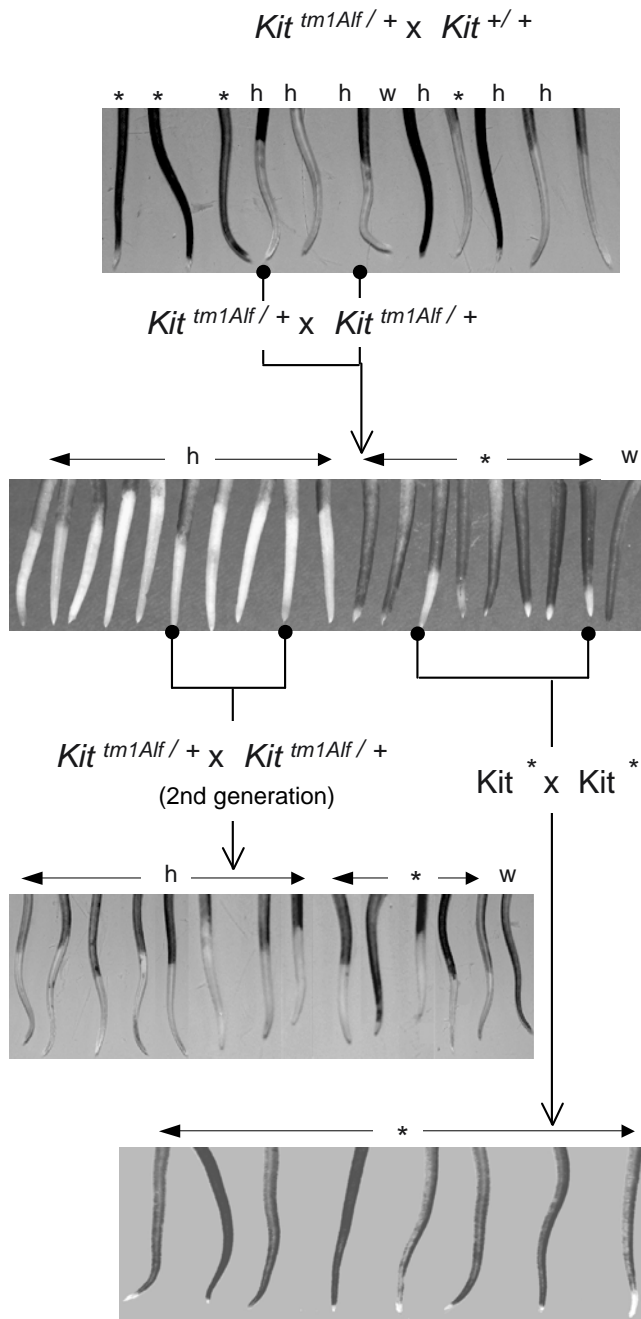

Supplement: 41586_2006_BFnature04674_MOESM3_ESM.pdf [file 41586_2006_BFnature04674_MOESM3_ESM.pdf]

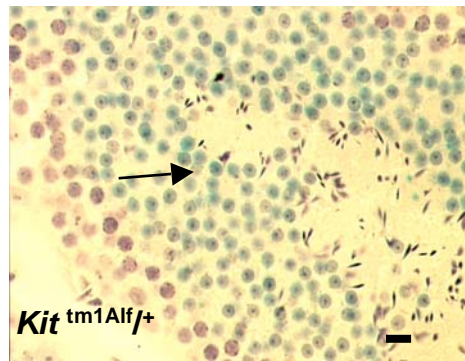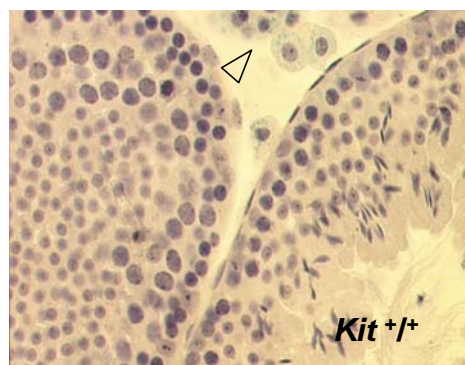

Supplement: 41586_2006_BFnature04674_MOESM4_ESM.pdf [file 41586_2006_BFnature04674_MOESM4_ESM.pdf]
